# Supplementary material for: Marrying luminescent Au nanoclusters to TiO2 for visible-light-driven antibacterial application
Source: Royal Society of Chemistry journal article supplement (doi:10.1039/d1nr05503h), 2021-01-01
Supplement: d1nr05503h1.pdf [file d1nr05503h1.pdf]

## Electronic Supplementary Material

### Marrying luminescent Au nanoclusters to TiO<sub>2</sub> for visible-light-driven antibacterial application

*Haiguang Zhu,<sup>†1</sup> Naiwei Liu,<sup>†1</sup> Ziping Wang,<sup>2</sup> Qiang Xue,<sup>1</sup> Qing Wang,<sup>1</sup> Xiaomeng Wang,<sup>1</sup> Yong Liu,<sup>1</sup> Zhengmao Yin,<sup>1</sup> and Xun Yuan\*<sup>1</sup>*

<sup>1</sup>College of Materials Science and Engineering, Qingdao University of Science and Technology (QUST), 53 Zhengzhou Rd., Shibei District, Qingdao 266042, P. R. China.

Email address: [yuanxun@qust.edu.cn](mailto:yuanxun@qust.edu.cn)

<sup>2</sup>Weifang University of Science and Technology, Shandong Peninsula Engineering Research Center of Comprehensive Brine Utilization, Weifang 262700, P. R. China.

<sup>†</sup>These two authors contributed equally to this article

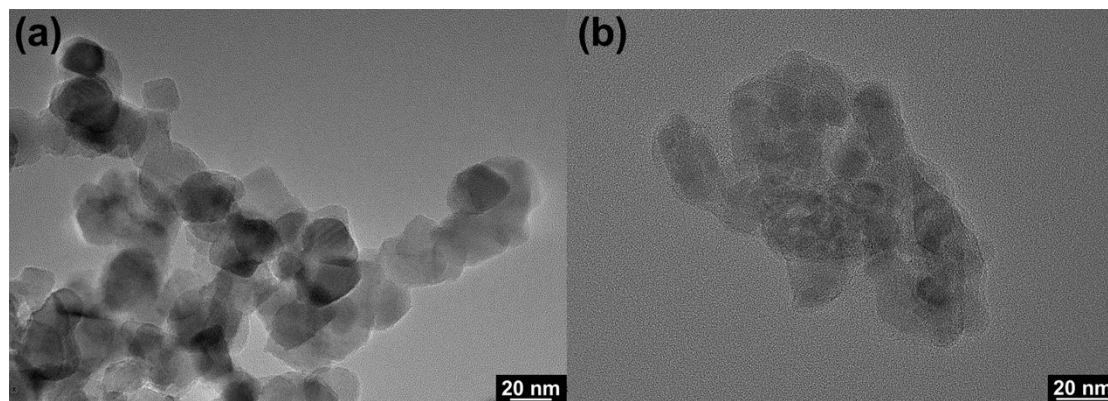

**Figure S1.** TEM images of TiO<sub>2</sub> nanoparticles before (a) and after (b) amination by APTES.

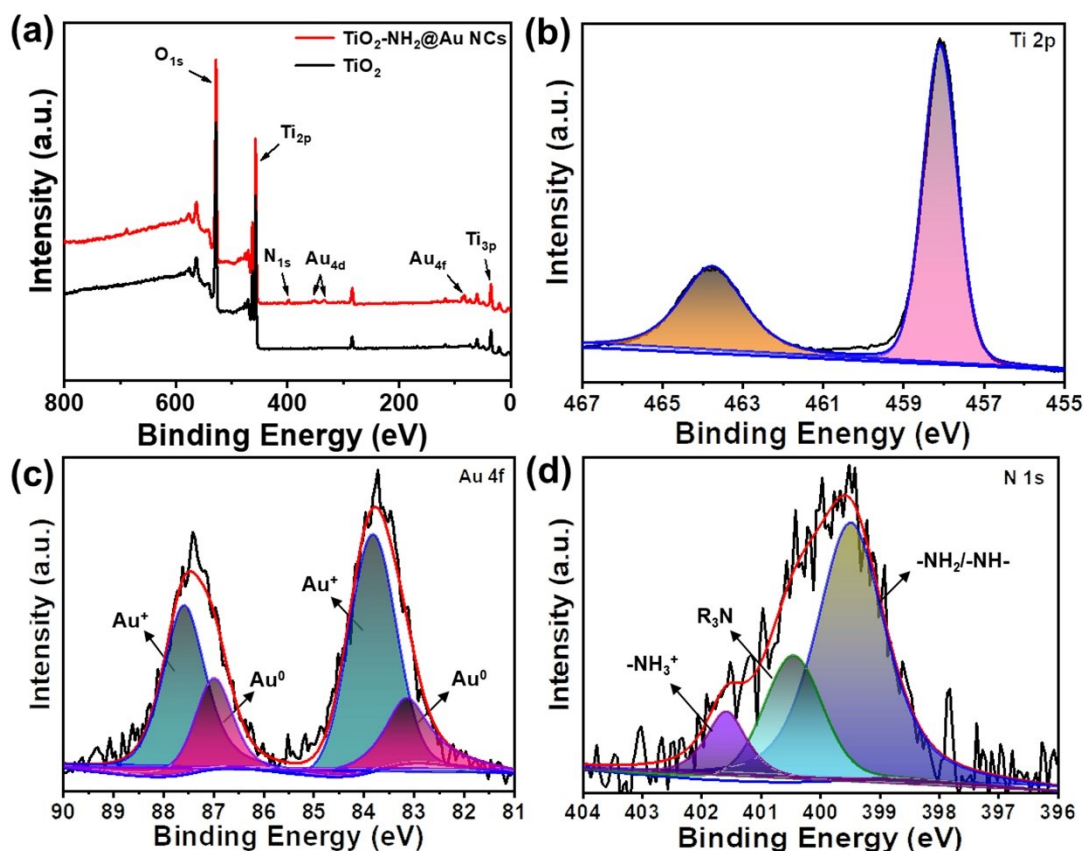

**Figure S2.** (a) XPS spectra of pristine  $\text{TiO}_2$  and  $\text{TiO}_2\text{-NH}_2\text{@Au NCs}$ . High-resolution XPS surveys of Ti 2p species (b) of pristine  $\text{TiO}_2$ , Au 4f species (c) and N 1s species (d) of  $\text{TiO}_2\text{-NH}_2\text{@Au NCs}$ .

**Supplementary Note I:** XPS was performed to analyze the surface composition as well as the chemical valence states of  $\text{TiO}_2$  and  $\text{TiO}_2\text{-NH}_2\text{@Au NCs}$ . As shown in Figure S2a, the  $\text{TiO}_2\text{-NH}_2\text{@Au NCs}$  exhibits a weak signal of N 1s in the wide-scan XPS spectrum comparing with pristine  $\text{TiO}_2$ , which may be originated from the APTES and GSH. Moreover, two new signals corresponding to Au 4f and Au 4d could be clearly seen in the XPS spectrum of the  $\text{TiO}_2\text{-NH}_2\text{@Au NCs}$ , which provides another evidence on the hybridization of Au NCs with the  $\text{TiO}_2$ . Meanwhile, the high-resolution XPS survey of Ti 2p for pristine  $\text{TiO}_2$  (Figure S2b) exhibits two peaks at binding energies of 458.0 and 463.7 eV, corresponding to  $\text{Ti } 2p_{3/2}$  and  $\text{Ti } 2p_{1/2}$ , respectively.<sup>1</sup> The peaks

with binding energy of 87.00 eV and 83.10 eV in Figure S2c are ascribed to the Au 4f<sub>5/2</sub> and Au 4f<sub>7/2</sub> of metallic Au (Au<sup>0</sup>), respectively. By contrast, the additional doublet peaks at 87.80 eV and 83.80 eV are assigned to the Au 4f<sub>5/2</sub> and Au 4f<sub>7/2</sub> of Au<sup>+</sup>, respectively (Figure S2c).<sup>2-4</sup> In addition, the high-resolution N 1s spectrum of the TiO<sub>2</sub>-NH<sub>2</sub>@Au NCs could be deconvoluted to three components at 399.51, 400.79, and 401.63 eV (Figure S2d), which can be attributed to the -NH<sub>2</sub>/-NH-, R<sub>3</sub>N and -NH<sub>3</sub><sup>+</sup> functional groups, respectively.<sup>5</sup> As a result, it confirms the successful grafting of Au NCs on the surface of TiO<sub>2</sub>-NH<sub>2</sub>.

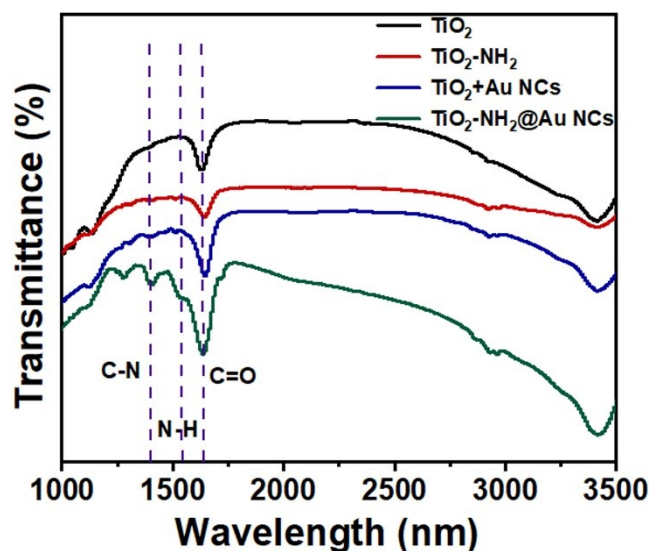

**Figure S3.** FTIR spectra of TiO<sub>2</sub>, TiO<sub>2</sub>-NH<sub>2</sub>, TiO<sub>2</sub>+Au NCs, and TiO<sub>2</sub>-NH<sub>2</sub>@Au NCs.

**Supplementary Note II:** As comparing with the FTIR spectra of TiO<sub>2</sub>, TiO<sub>2</sub>-NH<sub>2</sub> and TiO<sub>2</sub>+Au NCs, the FTIR spectrum of TiO<sub>2</sub>-NH<sub>2</sub>@Au NCs displays three peaks at 1640 cm<sup>-1</sup>, 1540 cm<sup>-1</sup>, and 1400 cm<sup>-1</sup>, corresponding to C=O stretching, N-H bending, and C-N stretching, respectively.<sup>6</sup> This result further proves that the TiO<sub>2</sub> and Au NCs are linked together by the amidation reaction.

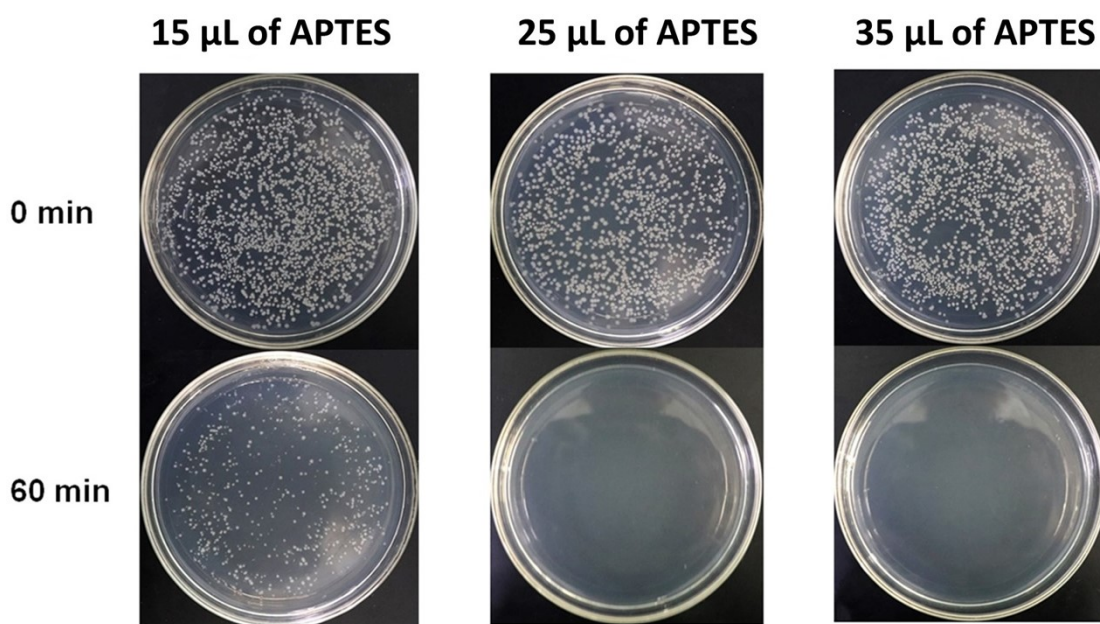

**Figure S4.** Bacterial colony growth of *E. coli* in presence of three samples of  $\text{TiO}_2\text{-NH}_2\text{@Au NCs}$  prepared with the APTES dosage of 15, 25, and 35  $\mu\text{L}$ .

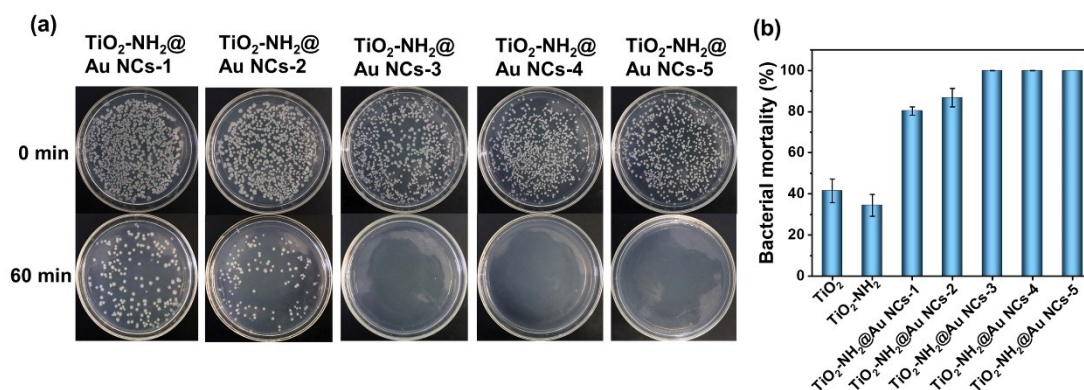

**Figure S5.** (a) Bacterial colony growth of *E. coli* in presence of five samples of  $\text{TiO}_2\text{-NH}_2\text{@Au NCs}$  with different loadings of Au NCs. (b) The antibacterial rates of  $\text{TiO}_2\text{-NH}_2\text{@Au NCs-X}$  photocatalysts as well as other reference samples such as  $\text{TiO}_2$  and  $\text{TiO}_2\text{-NH}_2$ . (Note: X = 1, 2, 3, 4 and 5, which correspond to samples with different concentrations of the loaded Au NCs from 4 mM, 8 mM, 12 mM, 16 mM, and 20 mM, respectively).

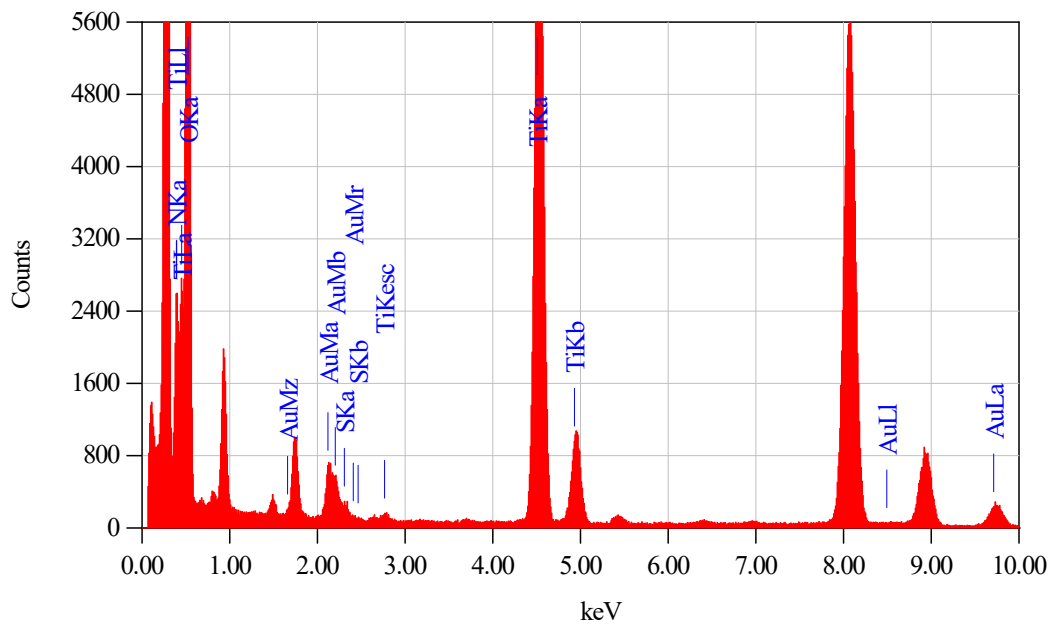

**Figure S6.** EDX spectrum of the  $\text{TiO}_2\text{-NH}_2\text{@Au}$  NCs prepared at the optimal concentration of Au NCs (i.e., 12 mM).

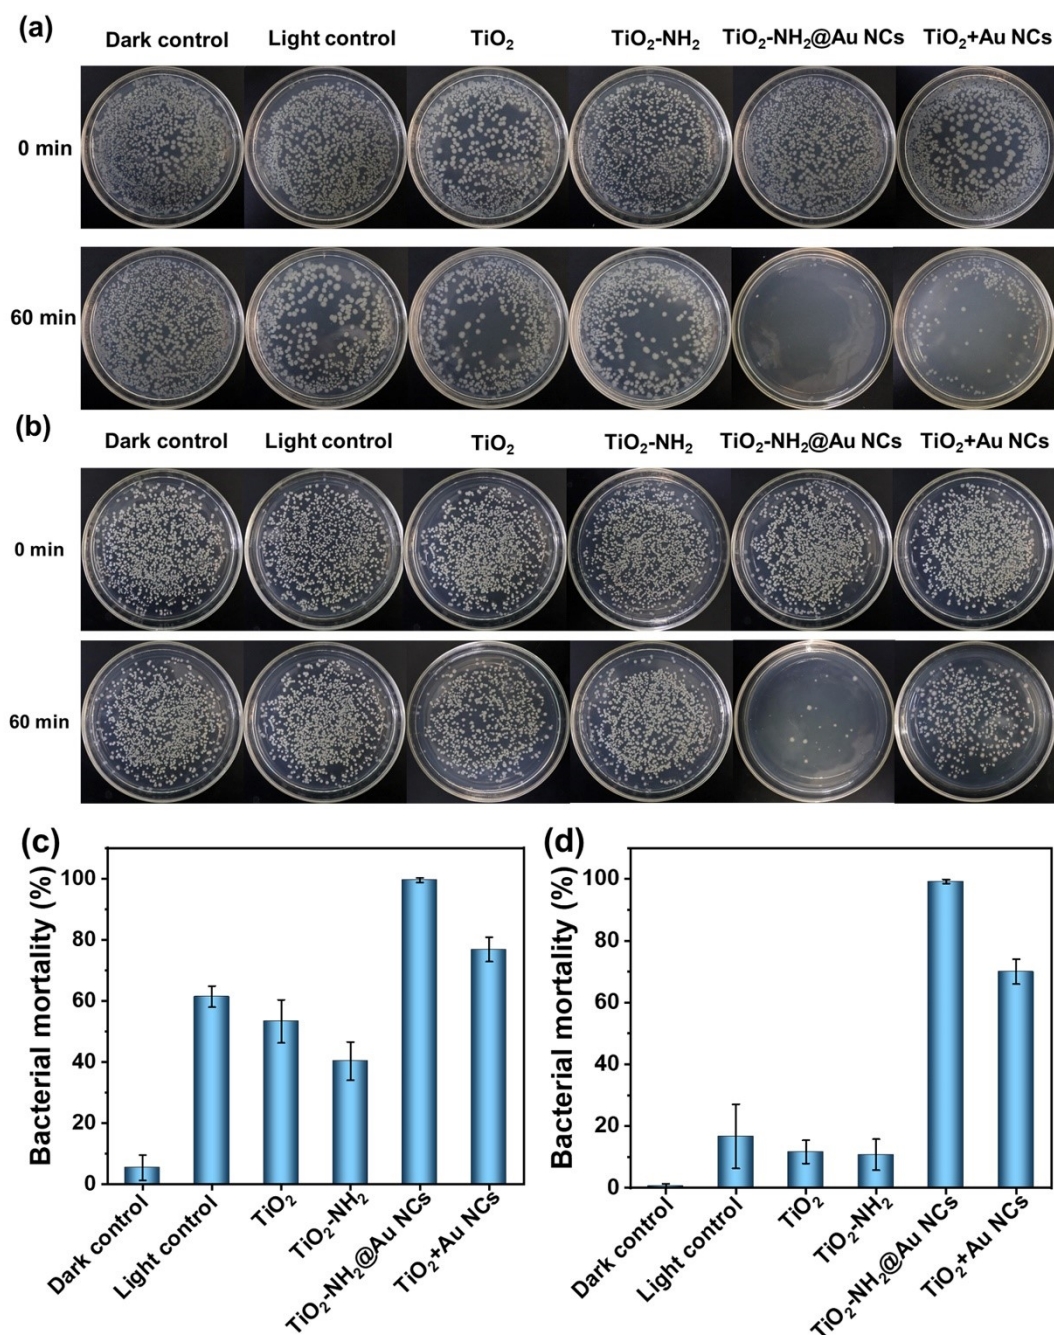

**Figure S7.** Bacterial colony growth of *B. subtilis* (a) and *P. aeruginosa* (b) in the presence of  $\text{TiO}_2$ ,  $\text{TiO}_2\text{-NH}_2$ ,  $\text{TiO}_2\text{-NH}_2\text{@Au NCs}$ ,  $\text{TiO}_2\text{+Au NCs}$  under either visible light illumination or dark condition for 60 min. Bactericidal activity for gram-positive *B. subtilis* (c) and gram-negative *P. aeruginosa* (d) under different conditions.

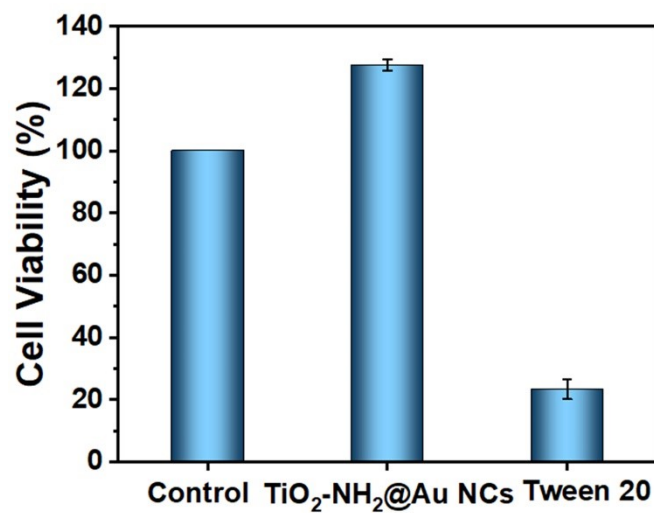

**Figure S8.** Cytotoxicity assay of TiO<sub>2</sub>-NH<sub>2</sub>@Au NCs with the same dosage of HeLa cells evaluated by MTT Kit after 24 h treatment.

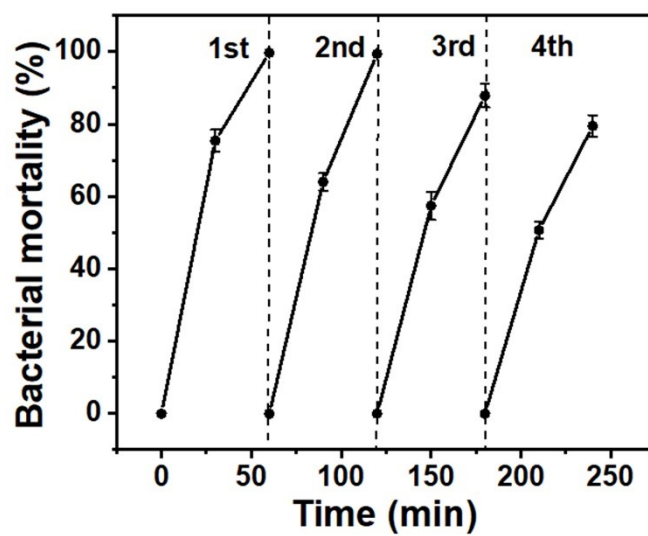

**Figure S9.** Durability test of the TiO<sub>2</sub>-NH<sub>2</sub>@Au NCs for visible-light-driven bacterial killing of *E. coli*.

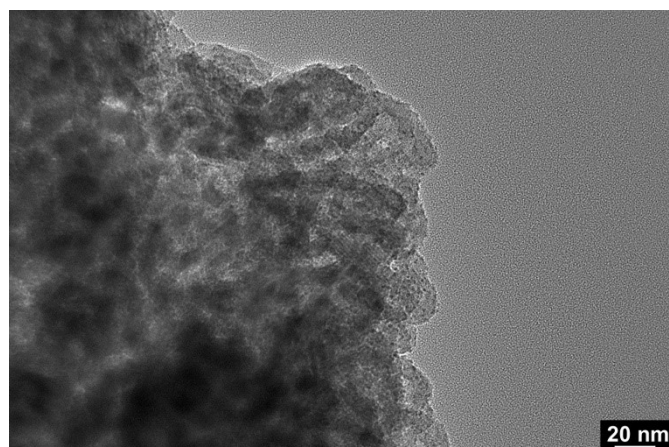

**Figure S10.** TEM image of the  $\text{TiO}_2\text{-NH}_2\text{@Au}$  NCs after photocatalytic test.

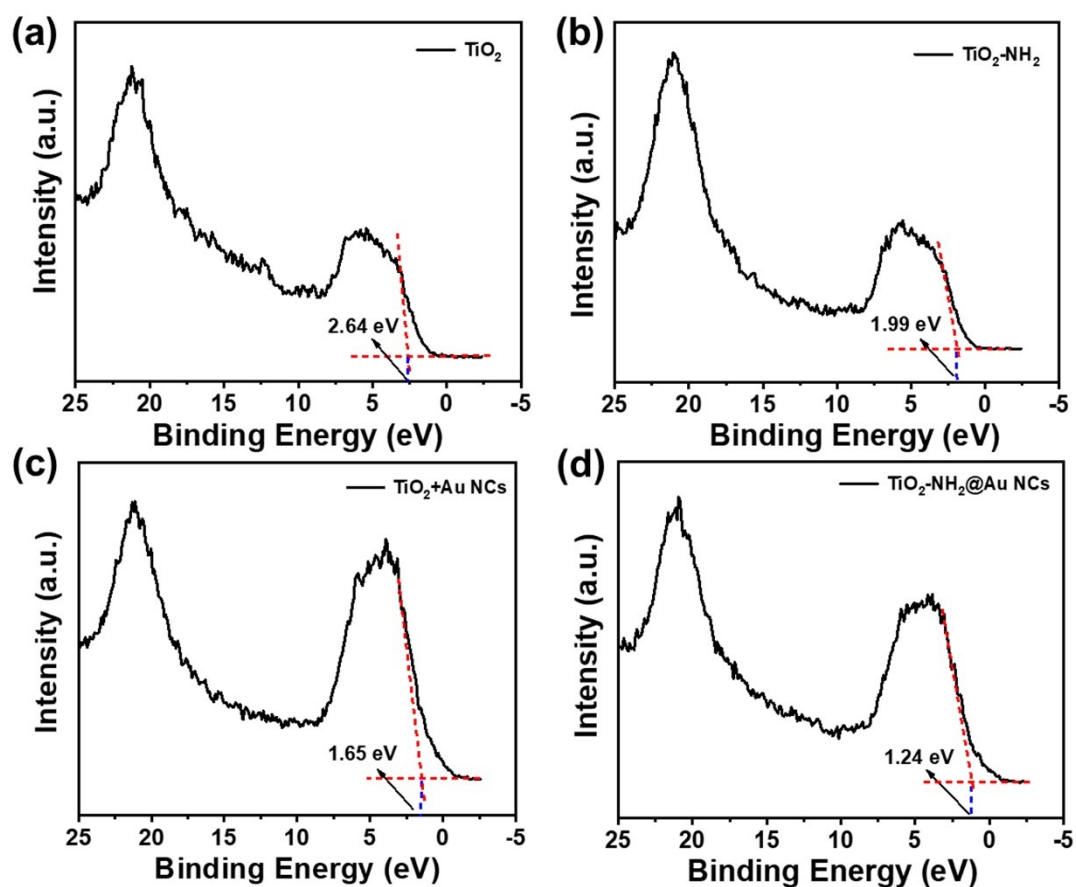

**Figure S11.** VB-XPS curves of  $\text{TiO}_2$  (a),  $\text{TiO}_2\text{-NH}_2$  (b),  $\text{TiO}_2\text{+Au NCs}$  (c) and  $\text{TiO}_2\text{-NH}_2\text{@Au NCs}$  (d).

**Supplementary Note III:** From the VB-XPS plots, the VB potentials of  $\text{TiO}_2$ ,  $\text{TiO}_2\text{-NH}_2$ ,  $\text{TiO}_2\text{+Au NCs}$  and  $\text{TiO}_2\text{-NH}_2\text{@Au NCs}$  ( $E_{\text{VB-XPS}}$ ) were measured as 2.64, 1.99, 1.65 and 1.24 eV according to their VB-XPS plots, respectively. Therefore, the VB



values (vs. NHE) of  $\text{TiO}_2$ ,  $\text{TiO}_2\text{-NH}_2$ ,  $\text{TiO}_2\text{+Au NCs}$  and  $\text{TiO}_2\text{-NH}_2\text{@Au NCs}$  were calculated to be 2.70, 2.05, 1.71 and 1.30 eV, respectively, based on the formula  $E_{\text{NHE}} = \varphi + E_{\text{VB-XPS}} - 4.44$  ( $E_{\text{NHE}}$ : standard hydrogen electrode potential;  $\varphi$ : electron work function of the XPS analyzer, and the value was 4.50).<sup>7, 8</sup> The CB position can be deduced from the equation,  $E_{\text{CB}} = E_{\text{VB}} - E_{\text{g}}$  ( $E_{\text{g}}$  is the energy bandgap). On the basis of the above equations, the CB positions of  $\text{TiO}_2$ ,  $\text{TiO}_2\text{-NH}_2$ ,  $\text{TiO}_2\text{+Au NCs}$  and  $\text{TiO}_2\text{-NH}_2\text{@Au NCs}$  were calculated to be -0.50, -1.11, -1.38 and -1.45 eV, respectively.

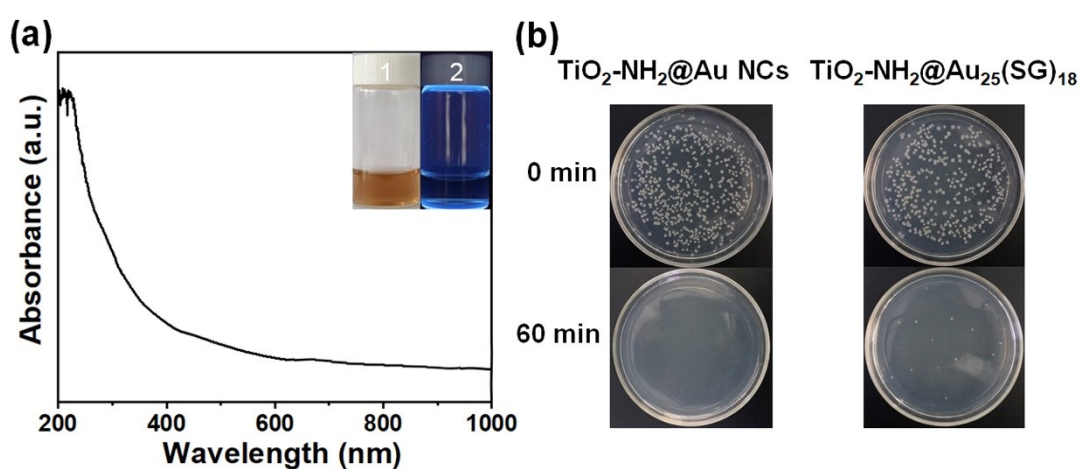

**Figure S12.** (a) UV-visible absorption spectra of  $\text{Au}_{25}(\text{SG})_{18}$ . The inset show digital photos of the  $\text{Au}_{25}(\text{SG})_{18}$  solution under (1) visible and (2) UV light irradiation. (b) Bacterial colony growth of *E. coli* in the presence of  $\text{TiO}_2\text{-NH}_2\text{@Au NCs}$  and  $\text{TiO}_2\text{-NH}_2\text{@Au}_{25}(\text{SG})_{18}$  under visible light illumination for 60 min.

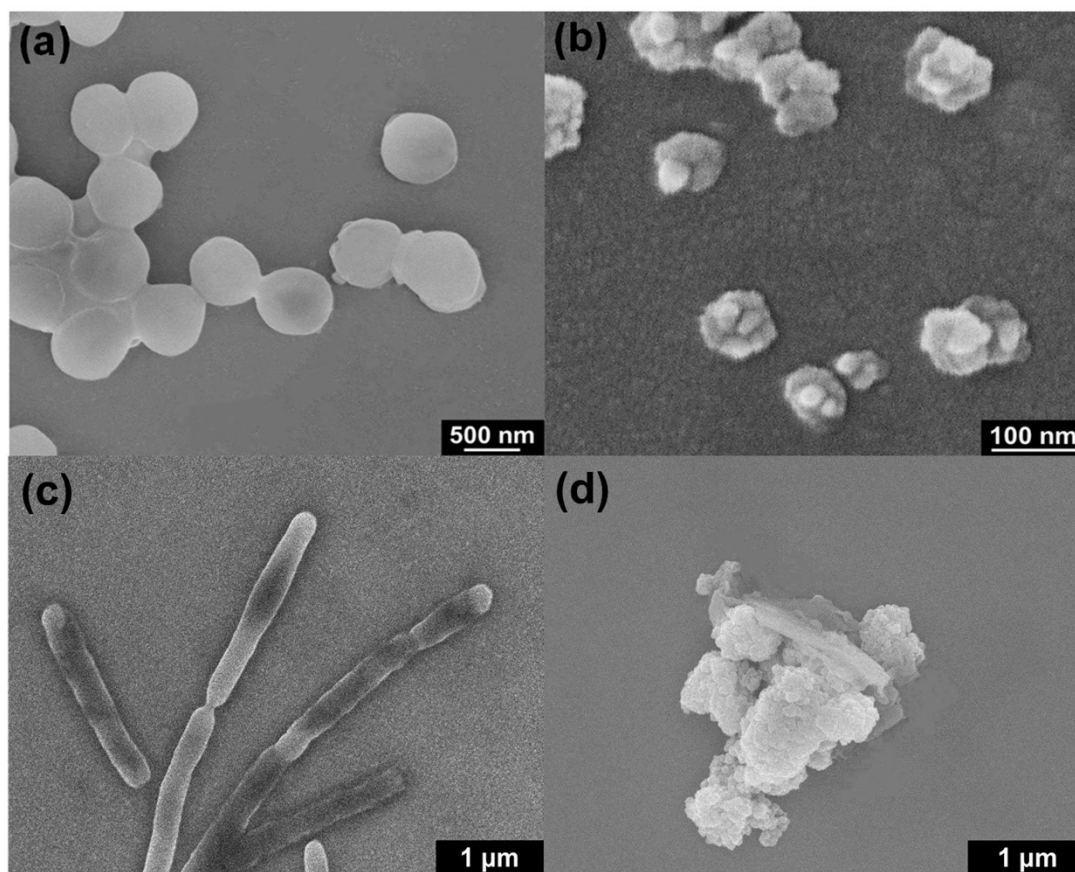

**Figure S13.** Typical SEM images of bacteria before (a, c) and after (b, d) visible light illumination for 60 min over  $\text{TiO}_2\text{-NH}_2\text{@Au}$  NCs. *S. aureus*: (a, b); *E. coli*: (c, d).

### Reference

1. F.-X. Xiao, Z. Zeng and B. Liu, *J. Am. Chem. Soc.*, 2015, **137**, 10735-10744.
2. Y.-S. Chen, H. Choi and P. V. Kamat, *J. Am. Chem. Soc.*, 2013, **135**, 8822-8825.
3. Y.-S. Chen and P. V. Kamat, *J. Am. Chem. Soc.*, 2014, **136**, 6075-6082.
4. Z. Luo, X. Yuan, Y. Yu, Q. Zhang, D. T. Leong, J. Y. Lee and J. Xie, *J. Am. Chem. Soc.*, 2012, **134**, 16662-16670.
5. Z. Zeng, Y.-B. Li, S. Chen, P. Chen and F.-X. Xiao, *J. Mater. Chem. A*, 2018, **6**, 11154-11162.
6. B. Tamami and H. Yeganeh, *Eur. Polym. J.*, 2002, **38**, 933-940.
7. J. Yuan, X. Liu, Y. Tang, Y. Zeng, L. Wang, S. Zhang, T. Cai, Y. Liu, S. Luo, Y. Pei and C. Liu, *Appl. Catal. B: Environ.*, 2018, **237**, 24-31.
8. J. Xiong, X. Li, J. Huang, X. Gao, Z. Chen, J. Liu, H. Li, B. Kang, W. Yao and Y. Zhu, *Appl. Catal. B: Environ.*, 2020, **266**, 118602.
